# Supplementary material for: Chromosome Diversity and Evolution in Helicoide a (Gastropoda: Stylommatophora): A Synthesis from Original and Literature Data
Source: MDPI journal article supplement (doi:10.3390/ani11092551), 2021-08-30
Supplement: s1 [file s1]

**Table S1.** List of available karyological data on Helicoidea. Taxonomy and nomenclature follow WoRMS (2021) [1] and MolluscaBase (2021) [2]. m = metacentric, sm = submetacentric, st = subtelocentric, t = telocentric; n e 2n = haploid and diploid chromosome number; ? = uncertain taxonomic attribution. C = C-banding; NOR = Ag-NOR staining; FISH = Fluorescence in situ hybridization.

| Family               | Tribe                                                  | Synonym used in the          | Origin | n  | 2n | Karyotype          | Method | Reference |
|----------------------|--------------------------------------------------------|------------------------------|--------|----|----|--------------------|--------|-----------|
| Subfamily            | Species                                                | original paper               |        |    |    |                    |        |           |
| <b>Camaenidae</b>    |                                                        |                              |        |    |    |                    |        |           |
| <b>Bradybaeninae</b> |                                                        |                              |        |    |    |                    |        |           |
| <b>Bradybaenini</b>  |                                                        |                              |        |    |    |                    |        |           |
|                      | <i>Acusta despecta</i> (G.B. Sowerby I, 1839)          | <i>Fruticicola despecta</i>  | Japan  | 29 | 58 |                    |        | [in 3]    |
|                      | <i>Acusta despecta sieboldtiana</i> (Pfeiffer, 1850)   |                              | Korea  | 29 | 58 | 12m, 17sm          |        | [in 4]    |
|                      | <i>Acusta despecta sieboldtiana</i> (Pfeiffer, 1850)   |                              | Japan  | 29 | 58 | 21m, 7sm, 1st      |        | [in 4]    |
|                      | <i>Acusta ravida</i> (Benson, 1842)                    | <i>Bradybaena ravida</i>     | China  | 29 | 58 | 19m, 3sm, 7t       |        | [in 4]    |
|                      | <i>Bradybaena similaris</i> (Férussac, 1822)           |                              | Japan  | 28 | 56 |                    |        | [in 3]    |
|                      | <i>Bradybaena similaris</i> (Férussac, 1822)           |                              | Japan  | 28 | 56 | 2m, 2/3sm, 24/23t  |        | [5]       |
|                      | <i>Cathaica fasciola</i> (Draparnaud, 1801)            |                              | China  | 30 | 60 | 7m, 1sm, 22t       |        | [in 4]    |
|                      | <i>Ezohelix gainesi</i> (Pilsbry, 1900)                | <i>Bradybaena gainesi</i>    | Japan  | 28 | 56 |                    |        | [in 3]    |
|                      | <i>Ezohelix gainesi</i> (Pilsbry, 1900)                | <i>Bradybaena gainesi</i>    | Korea  | 29 | 58 |                    |        | [in 6]    |
|                      | <i>Fruticicola fruticum</i> (O.F. Müller, 1774)        | <i>Eulota fruticum</i>       | Europa | 29 | 58 |                    |        | [in 3]    |
|                      | <i>Fruticicola koreana</i> (Pfeiffer, 1850)            | <i>Koreanohadra koreana</i>  | Korea  | 29 | 58 | 23m, 5sm, 1t       |        | [in 6]    |
|                      | <i>Fruticicola koreana</i> (Pfeiffer, 1850)            | <i>Koreanohadra koreana</i>  | Korea  | 29 | 58 | 10m, 13sm, 1st, 5t |        | [in 4]    |
|                      | <i>Fruticicola koreana</i> (Pfeiffer, 1850)            | <i>Koreanohadra koreana</i>  | Korea  | 29 | 58 | 16m, 12sm, 1st     |        | [6]       |
|                      | <i>Fruticicola kurodana</i> (Pilsbry, 1926)            | <i>Koreanohadra kurodana</i> | Korea  | 29 | 58 | 11m, 17sm, 1t      |        | [in 4]    |
|                      | <i>Karaftohelix adamsi</i> (Kuroda & Hukuda, 1944)     | <i>Koreanohadra adamsi</i>   | Korea  | 29 | 58 | 10m, 18sm, 1st     |        | [in 4]    |
| <b>Aegistini</b>     |                                                        |                              |        |    |    |                    |        |           |
|                      | <i>Aegista chosenica</i> (Pilsbry, 1927)               |                              | Korea  | 28 | 56 | 10m, 18sm          |        | [in 4]    |
|                      | <i>Aegista diversa</i> Kuroda & Miyanaga, 1936         |                              | Korea  | 28 | 56 | 14m, 14sm          |        | [in 4]    |
|                      | <i>Aegista kiusiuensis</i> (Pilsbry, 1900)             | <i>Aegista vatheleti</i>     | Japan  | 29 | 58 |                    |        | [in 3]    |
|                      | <i>Aegista quelpartensis</i> (Pilsbry & Hirase, 1908)  |                              | Korea  | 28 | 56 | 15m, 10sm, 3st     |        | [in 4]    |
|                      | <i>Nesiohelix samarangae</i> (Kuroda & Miyanaga, 1943) |                              | Korea  | 29 | 58 | 12m, 9sm, 2st, 1t  |        | [in 4]    |
|                      | <i>Satsuma japonica</i> (L. Pfeiffer, 1847)            |                              | Japan  | 29 | 58 | 19m, 10sm          |        | [7]       |
|                      | <i>Satsuma myomphala</i> (Martens, 1865)               |                              | Japan  | 29 | 58 |                    |        | [in 3]    |
|                      | <i>Satsuma omphalodes</i> (Pilsbry, 1901)              |                              | Japan  | 29 | 58 | 19m, 10sm          |        | [in 4]    |
| <b>Euhadrini</b>     |                                                        |                              |        |    |    |                    |        |           |
|                      | <i>Euhadra amaliae</i> (Kobelt, 1875)                  |                              | Japan  | 28 | 56 | 19m, 9sm           |        | [in 4]    |
|                      | <i>Euhadra awaensis</i> (Pilsbry, 1902)                |                              | Japan  | 29 | 58 |                    |        | [in 3]    |
|                      | <i>Euhadra callizona</i> (Crosse, 1871)                |                              | Japan  | 28 | 56 |                    |        | [in 3]    |
|                      | <i>Euhadra callizona</i> (Crosse, 1871)                |                              | Japan  | 28 | 56 | 19m, 9sm           |        | [in 4]    |
|                      | <i>Euhadra congenita</i> (E.A. Smith, 1878)            |                              | Japan  | 28 | 56 |                    |        | [in 3]    |
|                      | <i>Euhadra dixonii</i> (Pilsbry, 1900)                 |                              | Japan  | 28 | 56 | 19m, 9sm           |        | [in 4]    |

## Hadrinae

|                                                       |                                  |           |    |    |           |        |
|-------------------------------------------------------|----------------------------------|-----------|----|----|-----------|--------|
| <i>Euhadra eoa</i> (Crosse, 1868)                     |                                  | Japan     | 28 | 56 |           | [in 3] |
| <i>Euhadra eoa</i> (Crosse, 1868)                     |                                  | Japan     | 28 | 56 | 19m, 9sm  | [in 4] |
| <i>Euhadra grata</i> (Gude, 1900)                     |                                  | Japan     | 28 | 56 |           | [in 3] |
| <i>Euhadra idzumonis</i> (Pilsbry & Gulick, 1900)     |                                  | Japan     | 29 | 58 |           | [in 3] |
| <i>Euhadra peliomphala</i> (L. Pfeiffer, 1850)        |                                  | Japan     | 28 | 56 |           | [in 3] |
| <i>Euhadra peliomphala simodae</i> (Jay, 1856)        |                                  | Japan     | 28 | 56 | 18m, 10sm | [in 4] |
| <i>Euhadra quaesita</i> (Deshayes, 1850)              |                                  | Japan     | 29 | 56 |           | [in 3] |
| <i>Euhadra sandai</i> (Kobelt, 1879)                  |                                  | Japan     | 28 | 56 |           | [in 6] |
| <i>Euhadra sandai oki</i> Pilsbry, 1928               |                                  | Japan     | 28 | 56 | 21m, 7sm  | [in 4] |
| <i>Euhadra sandoensis</i> (Pilsbry & Y. Hirase, 1903) |                                  | Japan     | 28 | 56 |           | [in 3] |
| <i>Euhadra scaevola</i> (Martens, 1877)               |                                  | Japan     | 29 | 58 |           | [in 3] |
| <i>Euhadra senckenbergiana</i> (Kobelt, 1875)         |                                  | Japan     | 28 | 56 |           | [in 3] |
| <i>Euhadra senckenbergiana</i> (Kobelt, 1875)         |                                  | Japan     | 28 | 56 |           | [in 6] |
| <i>Euhadra subnimbosa</i> (Kobelt, 1894)              |                                  | Japan     | 28 | 56 | 21m, 9sm  | [in 4] |
| <i>Bentosites macleayi</i> (J.C. Cox, 1865)           |                                  | Australia | 29 | 58 |           | [8]    |
| <i>Catellotrachia setigera</i> (Tate, 1894)           | <i>Semotrachia setigera</i>      | Australia | 29 | 58 |           | [8]    |
| <i>Chloritobadistes</i> sp. Iredale, 1933             |                                  | Australia | 29 | 58 |           | [8]    |
| <i>Chloritobadistes victoriae</i> (Cox, 1868)         |                                  | Australia | 29 | 58 |           | [8]    |
| <i>Cupedora cassandra</i> (Pfeiffer, 1864)            | <i>Meracomelon cassandra</i>     | Australia | 29 | 58 |           | [8]    |
| <i>Cupedora evandaleana</i> (Pfeiffer, 1864)          |                                  | Australia | 29 | 58 |           | [8]    |
| <i>Cupedora patruelis</i> (Angas, 1864)               |                                  | Australia | 29 | 58 |           | [8]    |
| <i>Cupedora rufofasciata</i> Brazier, 1875            | <i>Meracomelon rufofasciatum</i> | Australia | 29 | 58 |           | [8]    |
| <i>Cupedora</i> sp. Iredale, 1937                     |                                  | Australia | 29 | 58 |           | [in 3] |
| <i>Cupedora</i> sp. Iredale, 1937                     |                                  | Australia | 29 | 58 |           | [8]    |
| <i>Cupedora sutillosa</i> (Férussac, 1839)            | <i>Exilibadistes sutillosa</i>   | Australia | 29 | 58 |           | [8]    |
| <i>Glyptorhagada kooringsensis</i> (Angas, 1877)      |                                  | Australia | 29 | 58 |           | [8]    |
| <i>Granulomelon adcockianum</i> (Bednall, 1894)       | <i>Pleuroxia adcockiana</i>      | Australia | 29 | 58 |           | [8]    |
| <i>Hadra</i> sp. E.von Martens, 1860                  |                                  | Australia | 29 | 58 |           | [in 3] |
| <i>Meracomelon moorundianum</i> T. Iredale, 1937      |                                  | Australia | 29 | 58 |           | [8]    |
| <i>Meracamelon</i> sp.                                |                                  | Australia | 29 | 58 |           | [in 3] |
| <i>Meracomelon subloriolianum</i> (Pilsbry, 1890)     |                                  | Australia | 29 | 58 |           | [8]    |
| <i>Papuina</i> sp. E. von Martens, 1860               |                                  | Australia | 29 | 58 |           | [in 3] |
| <i>Parglogenia pelodes</i> (Pfeiffer, 1846)           |                                  | Australia | 29 | 58 |           | [8]    |
| <i>Planispira fallaciosa</i> (A.E.J. Férussac, 1821)  |                                  | Australia | 29 | 58 |           | [in 3] |
| <i>Pleuroxia</i> sp. Ancey, 1887                      |                                  | Australia | 29 | 58 |           | [in 3] |
| <i>Pleuroxia</i> sp. Ancey, 1887                      |                                  | Australia | 29 | 58 |           | [8]    |

Geomitridae  
Helicellinae

|                                                          |                             |           |    |    |                   |        |                  |
|----------------------------------------------------------|-----------------------------|-----------|----|----|-------------------|--------|------------------|
| <i>Pommerhelix depressa</i> (Hedley, 1901) n. comb.      | <i>Meridiolum depressum</i> | Australia | 29 | 58 |                   |        | [8]              |
| <i>Sinumelon bednalli</i> (Ponsonby, 1904)               |                             | Australia | 29 | 58 |                   |        | [8]              |
| <i>Sinumelon flindersi</i> (Adams & Angas, 1864)         |                             | Australia | 29 | 58 |                   |        | [8]              |
| <i>Sinumelon nullaboricum</i> (Tate, 1879)               |                             | Australia | 29 | 58 |                   |        | [8]              |
| <i>Sinumelon perinflatum</i> (Pfeiffer, 1864)            |                             | Australia | 29 | 58 |                   |        | [8]              |
| <i>Sinumelon remissum</i> Iredale, 1937                  |                             | Australia | 29 | 58 |                   |        | [8]              |
| <i>Sinumelon</i> sp. Iredale, 1937                       |                             | Australia | 29 | 58 |                   |        | [in 3]           |
| <i>Sphaerospira fraseri</i> (Gray in Griffith & Pidgeon, |                             | Australia | 29 | 58 |                   |        | [8]              |
| <i>Strepsitaurus rugus</i> (Cotton, 1953)                | <i>Pleuroxia ruga</i>       | Australia | 29 | 58 |                   |        | [8]              |
| <i>Torresitrachia stipata</i> Iredale, 1938              |                             | Australia | 29 | 58 |                   |        | [8]              |
| <i>Xanthomelon durvillii</i> (Hombron & Jacquinot, 1841) |                             | Australia | 29 | 58 |                   |        | [8]              |
| <i>Xanthomelon</i> sp. E. von Martens, 1860              |                             | Australia | 29 | 58 |                   |        | [8]              |
|                                                          |                             |           |    |    |                   |        |                  |
| <b>Cernuellini</b>                                       |                             |           |    |    |                   |        |                  |
| <i>Cernuella neglecta</i> (Draparnaud, 1805)             |                             | Australia | 26 | 52 |                   |        | [in 3]           |
| <i>Cernuella virgata</i> (Da Costa, 1778)                | <i>Helicella virgata</i>    | Australia | 26 | 52 |                   |        | [in 3]           |
| <i>Cernuella virgata</i> (Da Costa, 1778)                |                             | Spain     | 26 | 52 |                   |        | [9]              |
| <i>Cernuella virgata</i> (Da Costa, 1778)                |                             | Italy     | 26 | 52 | 24m, 2sm          | C, NOR | [10]; this study |
| <i>Xerosecta cespitum</i> (Draparnaud, 1801)             | <i>Cernuella cespitum</i>   | Spain     | 25 | 50 |                   |        | [9]              |
| <i>Xerosecta reboudiana</i> (Bourguignat, 1863)          | <i>Cernuella reboudiana</i> | Spain     | 25 | 50 |                   |        | [9]              |
| <b>Cochlicellini</b>                                     |                             |           |    |    |                   |        |                  |
| <i>Cochlicella acuta</i> (O.F. Müller, 1774)             |                             | Europe    | 23 | 46 |                   |        | [in 3]           |
| <i>Cochlicella acuta</i> (O.F. Müller, 1774)             |                             | Spain     | 23 | 46 |                   |        | [9]              |
| <i>Cochlicella acuta</i> (O.F. Müller, 1774)             |                             | Italy     | 26 | 52 | 18m, 5sm, 2st, 1t |        | this study       |
| <i>Cochlicella barbara</i> (Linnaeus, 1758)              | <i>Cochlicella ventrosa</i> | Australia | 23 | 46 |                   |        | [in 3]           |
| <b>Helicellini</b>                                       |                             |           |    |    |                   |        |                  |
| <i>Candidula camporoblensis</i> (Fez, 1944)              |                             | Spain     | 26 | 52 |                   |        | [9]              |
| <i>Candidula unifasciata</i> (Poiret, 1801)              |                             | Europe    | 27 | 52 |                   |        | [in 3]           |
| <i>Helicella gigaxi</i> (O.F. Müller, 1774)              | <i>Candidula gigaxi</i>     | Spain     | 26 | 52 |                   |        | [9]              |
| <i>Helicella itala</i> (Linnaeus, 1758)                  |                             | Spain     | 26 | 52 |                   |        | [9]              |
| <i>Helicella itala</i> (Linnaeus, 1758)                  |                             | Europe    | 26 | 52 |                   |        | [in 3]           |
| <i>Helicella ordunensis</i> (Kobelt, 1883)               |                             | Spain     | 26 | 52 |                   |        | [in 3]           |
| <i>Helicella stiparum</i> (Rossmässler, 1854)            |                             | Spain     | 25 | 50 |                   |        | [in 3]           |
| <i>Microxeromagna lowei</i> (Potiez & Michaud, 1838)     | <i>Helicella virgata</i>    | Australia | 26 | 52 |                   |        | [in 3]           |
| <i>Xerolenta obvia</i> (Menke, 1828)                     | <i>Helicella obvia</i>      | Spain     | 26 | 52 |                   |        | [in 3]           |
| <i>Xeroplexa intersecta</i> (Poiret, 1801)               | <i>Candidula intersecta</i> | Spain     | 26 | 52 |                   |        | [11]             |
| <i>Xerotricha apicina</i> (Lamarck, 1822)                | <i>Helicopsis apicina</i>   | Portugal  | 26 | 52 | 23m, 2sm          |        | [in 4]           |

|            |                                                     |  |                            |          |    |    |              |            |
|------------|-----------------------------------------------------|--|----------------------------|----------|----|----|--------------|------------|
| Helicidae  | Zarateana rocandioi (Ortiz de Zárate y López, 1950) |  | Candidula rocandioi        | Portugal | 26 | 52 |              | [9]        |
|            | Helicopsini                                         |  |                            |          |    |    |              |            |
|            | Xeropicta derbentina (Krynicky, 1836)               |  |                            | Georgia  | 26 | 52 |              | [12]       |
|            | Trochoideini                                        |  |                            |          |    |    |              |            |
|            | Trochoidea elegans (Gmelin, 1791)                   |  |                            | Italy    | 24 | 48 | 16m, 6sm, 2t | this study |
|            | Trochoidea pyramidata (J.P.R. Draparnaud, 1805)     |  |                            | Italy    | 24 | 48 | 20m, 4sm     | this study |
|            | Trochoidea trochoides (Poiret, 1789)                |  |                            | Italy    | 24 | 48 | 16m, 7sm, 1t | this study |
|            | Xerocrassa cretica (L. Pfeiffer, 1841)              |  |                            | Turkey   | 26 | 52 |              | [in 3]     |
|            | Xerocrassa geyeri (Soós, 1926)                      |  |                            | Spain    | 25 | 50 |              | [9]        |
|            | Helicinae                                           |  |                            |          |    |    |              |            |
| Ariantinae |                                                     |  |                            |          |    |    |              |            |
|            | Arianta arbustorum (Linnaeus, 1758)                 |  | Helicigona arbustorum      | Europe   | 30 | 60 |              | [in 3]     |
|            | Campylaea planospira (Lamarck, 1822)                |  |                            | Italy    | 30 | 60 | 29m, 1sm     | this study |
|            | Causa holosericea (S. Studer, 1820)                 |  | Isognomostoma holosericum  | Europe   | 30 | 60 |              | [in 3]     |
|            | Chilostoma achates aethica (Rossmässler, 1835)      |  | Helicigona achates aethica | Europe   | 30 | 60 |              | [in 3]     |
|            | Helicigona lapicida (Linnaeus, 1758)                |  |                            | Europe   | 29 | 58 |              | [in 3]     |
|            | Helicigona pouzolzii (Deshayes, 1832)               |  |                            | Europe   | 29 | 58 |              | [in 3]     |
|            | Helicigona setosa (Férussac, 1832)                  |  |                            | Europe   | 29 | 58 |              | [in 3]     |
|            | Isognomostoma isognomostomos (Schröter, 1784)       |  |                            | Europe   | 30 | 60 |              | [in 3]     |
|            | Helicinae                                           |  |                            |          |    |    |              |            |
|            | Allognathini                                        |  |                            |          |    |    |              |            |
|            | Cepaea hortensis (O.F. Müller, 1774)                |  |                            | UK       | 22 | 44 | m/sm/st      | [in 4]     |
|            | Cepaea nemoralis (Linnæus, 1758)                    |  |                            | Europe   | 22 | 44 |              | [in 3]     |
|            | Cepaea nemoralis (Linnæus, 1758)                    |  |                            | UK       | 22 | 44 | 13m, 9sm     | [13]       |
|            | Cepaea nemoralis (Linnæus, 1758)                    |  |                            | UK       | 22 | 44 | 14m, 8sm     | [14]       |
|            | Cepaea nemoralis (Linnæus, 1758)                    |  |                            | UK       | 22 | 44 | m/sm/st      | [in 4]     |
|            | Iberus alonensis (Férussac,1821)                    |  |                            | Spain    | 22 | 44 | m/sm         | [in 4]     |
|            | Iberus gualterianus (Linnaeus, 1758)                |  |                            | Spain    | 22 | 44 | m/sm         | [in 4]     |
|            | Iberus guiraonus Rossmäessler in Pfeiffer, 1853)?   |  |                            | Spain    | 22 | 44 | m/sm         | [in 4]     |
|            | Iberus marmoratus (Férussac, 1821)                  |  |                            | Spain    | 22 | 44 | m/sm         | [in 4]     |
|            | Pseudotachea liturata (L. Pfeiffer, 1851)           |  |                            | Europe   | 22 | 44 |              | [in 3]     |
|            | Pseudotachea liturata (L. Pfeiffer, 1851)           |  |                            | Spain    | 22 | 44 |              | [11]       |
|            | Pseudotachea splendida (Draparnaud, 1801)           |  |                            | Spain    | 22 | 44 | m/sm         | [in 4]     |
|            | Helicini                                            |  |                            |          |    |    |              |            |
|            | Caucasotachea atrolabiata calligera (Dubois de      |  |                            | Georgia  | 26 | 52 |              | [15]       |
|            | Caucasotachea calligera (Dubois de Montpéreux,      |  |                            | Georgia  | 26 | 52 |              | [15]       |
|            | Caucasotachea leucoranea (Mousson, 1863)            |  | Caucasotachea leukoranea   | Iran     | 30 | 60 |              | [in 3]     |



|                        |                                                            |                                |          |    |    |                   |            |
|------------------------|------------------------------------------------------------|--------------------------------|----------|----|----|-------------------|------------|
| <b>Helicondontinae</b> |                                                            |                                |          |    |    |                   |            |
|                        | <i>Helicodonta obvoluta</i> (O.F. Müller, 1774)            |                                | Europe   | 27 | 54 |                   | [in 3]     |
| <b>Hygromiidae</b>     |                                                            |                                |          |    |    |                   |            |
| <b>Hygromiinae</b>     | <b>Hygromiini</b>                                          |                                |          |    |    |                   |            |
|                        | <i>Hygromia cinctella</i> (Draparnaud, 1801)               |                                | Europe   | 21 | 42 |                   | [in 3]     |
|                        | <i>Hygromia limbata</i> (Draparnaud, 1805)                 |                                | Spain    | 21 | 42 |                   | [in 4]     |
|                        | <b>Perforatellini</b>                                      |                                |          |    |    |                   |            |
|                        | <i>Monachoides incarnatus</i> (O. F. Müller, 1774)         | <i>Perforatella incarnata</i>  | Europe   | 24 | 48 |                   | [in 3]     |
| <b>Leptaxinae</b>      | <b>Leptaxini</b>                                           |                                |          |    |    |                   |            |
|                        | <i>Portugala inchoata</i> (Morelet, 1845)                  |                                | Portugal | 26 | 52 |                   | [in 4]     |
|                        | <b>Cryptosaccini</b>                                       |                                |          |    |    |                   |            |
|                        | <i>Mengoana jeschawi</i> (Kobelt, 1878)                    |                                | Spain    | 26 | 52 |                   | [in 3]     |
|                        | <i>Mengoana jeschawi</i> (Kobelt, 1878)                    | Eumphalia brigantina           | Spain    | 26 | 52 |                   | [11]       |
|                        | <i>Pyrenaearia cantabrica poncebensis</i> Ortiz de Zárate  |                                | Spain    | 26 | 52 |                   | [in 4]     |
|                        | <i>Pyrenaearia cantabrica poncebensis</i> Ortiz de Zárate  | <i>Pyrenaearia poncebensis</i> | Spain    | 26 | 52 | 13m, 8sm, 2st, 3t | [9]        |
| <b>Trochulininae</b>   | <b>Caucasigenini</b>                                       |                                |          |    |    |                   |            |
|                        | <i>Caucasigena eichwaldi</i> (L. Pfeiffer, 1846)           |                                | Georgia  | 23 | 46 |                   | [12]       |
|                        | <i>Circassina frutis</i> (L. Pfeiffer, 1859)               |                                | Georgia  | 23 | 46 |                   | [15]       |
|                        | <i>Fruticocampylaea narzanensis</i> (Krynicky, 1836)       |                                | Georgia  | 23 | 46 |                   | [12]       |
|                        | <b>Monachaini</b>                                          |                                |          |    |    |                   |            |
|                        | <i>Diplobursa pisiformis arpatschaiana</i> (Mousson, 1873) | <i>Euomphalia arpatschuana</i> | Iran     | 23 | 46 |                   | [in 3]     |
|                        | <i>Euomphalia strigella</i> (Draparnaud, 1801)             |                                | Spain    | 26 | 48 | 19m,5sm           | [9]        |
|                        | <i>Monacha cantiana</i> (Montagu, 1803)                    |                                | Europe   | 23 | 46 |                   | [in 3]     |
|                        | <i>Monacha cartusiana</i> (O.F. Müller, 1774)              |                                | Europe   | 23 | 46 |                   | [in 3]     |
|                        | <i>Monacha cartusiana</i> (O.F. Müller, 1774)              |                                | Spain    | 23 | 46 | 22m, 1sm          | [9]        |
|                        | <i>Monacha</i> sp.                                         |                                | Italy    | 23 | 46 | 20m, 3sm          | this study |
|                        | <b>Trochulini</b>                                          |                                |          |    |    |                   |            |
|                        | <i>Petasina unidentata</i> (Draparnaud, 1805)              | <i>Trichia unidentata</i>      | Europe   | 23 | 46 |                   | [in 3]     |
|                        | <i>Trochulus hispidus</i> (Linnæus, 1758)                  | <i>Trichia hispida</i>         | Spain    | 23 | 46 |                   | [11]       |
|                        | <i>Trochulus hispidus</i> (Linnæus, 1758)                  |                                | Czech    | 23 | 46 |                   | [19]       |
|                        | <i>Trochulus plebeius</i> (Draparnaud, 1805)               |                                | Czech    | 23 | 46 |                   | [19]       |
|                        | <i>Trochulus sericeus</i> (Draparnaud, 1801)               | <i>Trichia sericea</i>         | Europe   | 23 | 46 |                   | [in 3]     |
|                        | <i>Trochulus villosus</i> (Draparnaud, 1805)               | <i>Trichia villosa</i>         | Europe   | 23 | 46 |                   | [in 3]     |
| <b>Polygyridae</b>     |                                                            |                                |          |    |    |                   |            |
| <b>Triodopsinae</b>    | <b>Ashmunellini</b>                                        |                                |          |    |    |                   |            |
|                        | <i>Ashmunella ashmuni ashmuni</i> (Dall, 1897)             |                                | USA      | 29 | 58 |                   | [20]       |

|                                                            |                                |     |    |    |         |
|------------------------------------------------------------|--------------------------------|-----|----|----|---------|
| <i>Ashmunella levettei</i> (Bland, 1882)                   |                                | USA | 29 | 58 | [20]    |
| <i>Ashmunella mendax</i> Pilsbry & Ferriss, 1917           |                                | USA | 29 | 58 | [20]    |
| <i>Ashmunella mogollonensis</i> Pilsbry, 1905              |                                | USA | 29 | 58 | [20]    |
| <i>Ashmunella carlsbadensis</i> Pilsbry, 1932              |                                | USA | 29 | 58 | [20]    |
| <i>Ashmunella ferrissi</i> Pilsbry, 1905                   |                                | USA | 29 | 58 | [20]    |
| <i>Ashmunella kocki</i> Pilsbry, 1940                      |                                | USA | 29 | 58 | [20]    |
| <i>Ashmunella organensis</i> Pilsbry, 1936                 |                                | USA | 29 | 58 | [20]    |
| <i>Ashmunella pasonis</i> (Drake, 1951)                    |                                | USA | 29 | 58 | [20]    |
| <i>Ashmunella rhissa altissima</i> (Cockerell, 1898)       |                                | USA | 29 | 58 | [20]    |
| <i>Ashmunella</i> sp ( <i>ryssa complex</i> )              |                                | USA | 29 | 58 | [20]    |
| <i>Ashmunella tetrodon inermis</i> H. A. Pilsbry and J. H. |                                | USA | 29 | 58 | [20]    |
| <i>Ashmunella thomsoniana</i> (Ancey, 1887)                |                                | USA | 29 | 58 | [20]    |
| <i>Ashmunella walkeri</i> Ferriss, 1904                    |                                | USA | 29 | 58 | [20]    |
| <b>Mesodontini</b>                                         |                                |     |    |    |         |
| <i>Inflectarius inflectus</i> (Say, 1821)                  |                                | USA | 29 | 58 | [21]    |
| <i>Inflectarius rugeli</i> (Shuttleworth, 1852)            | <i>Mesodon rugeli</i>          | USA | 29 | 58 | [21]    |
| <i>Inflectarius</i> sp. Pilsbry, 1940                      |                                | USA | 29 | 58 | [21]    |
| <i>Mesodon andrewsae normalis</i> (W.G. Binney, 1879)      |                                | USA | 29 | 58 | [21]    |
| <i>Mesodon appressus</i> (Say, 1821)                       |                                | USA | 29 | 58 | [21]    |
| <i>Mesodon mitchellianus</i> (I. Lea, 1838)                |                                | USA | 29 | 58 | [21]    |
| <i>Mesodon normalis</i> (Pilsbry, 1900)                    |                                | USA | 29 | 58 | [21]    |
| <i>Mesodon thyroidus</i> (Say, 1817)                       |                                | USA | 29 | 58 | [in 3]  |
| <i>Mesodon thyroidus</i> (Say, 1817)                       |                                | USA | 29 | 58 | [21]    |
| <i>Mesodon zaletus</i> (A. Binney, 1837)                   |                                | USA | 29 | 58 | [21]    |
| <i>Patera appressa</i> (Say, 1821)                         | <i>Polygyra appressa</i>       | USA | 29 | 58 | [21]    |
| <i>Patera appressa</i> (Say, 1821)                         | <i>Polygyra appressa</i>       | USA | 31 | 62 | [in 21] |
| <b>Stenotrematini</b>                                      |                                |     |    |    |         |
| <i>Stenotrema hirsutum</i> (Say, 1817)                     |                                | USA | 29 | 58 | [in 3]  |
| <i>Stenotrema monodon aliciae</i> (Pilsbry, 1893)          |                                | USA | 29 | 58 | [21]    |
| <i>Stenotrema monodon aliciae</i> (Pilsbry, 1893)          |                                | USA | 29 | 58 | [21]    |
| <i>Stenotrema monodon aliciae</i> (Pilsbry, 1893)          | <i>Stenotrema leai aliciae</i> | USA | 29 | 58 | [in 3]  |
| <i>Stenotrema spinosum</i> (I. Lea, 1831)                  |                                | USA | 29 | 58 | [in 3]  |
| <i>Stenotrema stenotrema</i> (L. Pfeiffer, 1842)           |                                | USA | 29 | 58 | [in 3]  |
| <b>Allogonini</b>                                          |                                |     |    |    |         |
| <i>Allogona profunda</i> (Say, 1821)                       |                                | USA | 26 | 52 | [in 3]  |
| <i>Allogona townsendiana</i> (I. Lea, 1838)                |                                | USA | 26 | 52 | [in 3]  |
| <i>Cryptomastix germana</i> (Gould in W.G. Binney, 1851)   | <i>Triodopsis germana</i>      | USA | 31 | 62 | [in 3]  |

|                           |                                                             |                              |          |    |     |                |     |         |
|---------------------------|-------------------------------------------------------------|------------------------------|----------|----|-----|----------------|-----|---------|
|                           | <b>Triodopsisini</b>                                        |                              |          |    |     |                |     |         |
|                           | <i>Neohelix albolabris</i> (Say, 1817)                      | <i>Triodopsis albolabris</i> | USA      | 29 | 58  |                |     | [21]    |
|                           | <i>Neohelix dentifera</i> (A. Binney, 1837)                 | <i>Triodopsis dentifera</i>  | USA      | 29 | 58  |                |     | [21]    |
|                           | <i>Triodopsis fraudolenta fraudolenta</i> (Pilsbry, 1894)   |                              | USA      | 29 | 58- |                |     | [21]    |
|                           | <i>Triodopsis fraudulentula vulgata</i> (Pilsbry, 1894)     |                              | USA      | 29 | 58- |                |     | [21]    |
|                           | <i>Triodopsis juxtidentula juxtidentula</i> (Pilsbry, 1894) |                              | USA      | 29 | 58  |                |     | [21]    |
|                           | <i>Triodopsis tridentata</i> (Say, 1817)                    |                              | USA      | 29 | 58  |                |     | [21]    |
|                           | <i>Triodopsis tridentata</i> (Say, 1817)                    |                              | USA      | 29 | 58  |                |     | [21]    |
|                           | <i>Triodopsis tridentata. edentilabris</i> Pilsbry, 1940?   |                              | USA      | 29 | 58  |                |     | [21]    |
|                           | <i>Triodopsis vulgata</i> Pilsbry, 1940                     |                              | USA      | 29 | 58  |                |     | [21]    |
|                           | <i>Xolotrema fosteri</i> (F.C. Baker, 1932)                 |                              | USA      | 31 | 62  | 21m, 7sm, 3st  | NOR | [22]    |
|                           | <b>Vespericolini</b>                                        |                              |          |    |     |                |     |         |
|                           | <i>Vespericola columbiana</i> (I. Lea, 1839)                |                              | USA      | 30 | 60  |                |     | [in 3]  |
|                           |                                                             |                              |          |    |     |                |     |         |
|                           | <i>Polygira cereolus</i> (Megerle von Mühlfeldt, 1818)      |                              | USA      | 29 | 58  |                |     | [in 3]  |
|                           |                                                             |                              |          |    |     |                |     |         |
|                           |                                                             |                              |          |    |     |                |     |         |
|                           |                                                             |                              |          |    |     |                |     |         |
|                           |                                                             |                              |          |    |     |                |     |         |
|                           |                                                             |                              |          |    |     |                |     |         |
| <b>Trissexodontidae</b>   |                                                             |                              |          |    |     |                |     |         |
| <b>Trissexodontinae</b>   |                                                             |                              |          |    |     |                |     |         |
|                           | <b>Oestophorini</b>                                         |                              |          |    |     |                |     |         |
|                           | <i>Oestophora barbula</i> (Rossmässler, 1838)               |                              | Portugal | 30 | 60  |                |     | [in 4]  |
|                           |                                                             |                              |          |    |     |                |     |         |
|                           |                                                             |                              |          |    |     |                |     |         |
|                           |                                                             |                              |          |    |     |                |     |         |
|                           |                                                             |                              |          |    |     |                |     |         |
|                           |                                                             |                              |          |    |     |                |     |         |
|                           |                                                             |                              |          |    |     |                |     |         |
|                           |                                                             |                              |          |    |     |                |     |         |
|                           |                                                             |                              |          |    |     |                |     |         |
| <b>Xanthonychidae</b>     |                                                             |                              |          |    |     |                |     |         |
| <b>Helminthoglyptinae</b> |                                                             |                              |          |    |     |                |     |         |
|                           | <b>Sonorellini</b>                                          |                              |          |    |     |                |     |         |
|                           | <i>Sonorella odorata</i> Pilsbry & Ferriss, 1919            |                              | USA      | 29 | 58  | 15m, 13sm, 1st |     | [23]    |
|                           | <b>Helminthoglyptini</b>                                    |                              |          |    |     |                |     |         |
|                           | <i>Eremarionta indioensis</i> (Yates, 1890)                 |                              | USA      | 30 | 60  | 18m, 11sm, 1st |     | [23]    |
|                           | <i>Greggelix indigena</i> (Mabille, 1895)                   |                              | USA      | 29 | 58  | 16m, 10sm, 3st |     | [23]    |
|                           | <i>Helminthoglypta cfr. lowei</i> (Bartsch, 1918)           |                              | USA      | 30 | 60  | 17m, 10sm, 3st |     | [23]    |
|                           | <i>Helminthoglypta micrometalleoides</i> W.B. Miller, 1970  |                              | USA      | 30 | 60  | 17m, 10sm, 3st |     | [23]    |
|                           | <i>Micrarionta beatula</i> Cockerell, 1929                  | <i>M. rufocincta beatula</i> | USA      | 30 | 60  | 18m, 10sm, 2st |     | [23]    |
|                           | <i>Sonorelix borregoensis</i> (S.S. Berry, 1929)            |                              | USA      | 29 | 58  | 13m, 15sm, 1st |     | [23]    |
|                           | <i>Xerarionta areolata</i> (L. Pfeiffer, 1845)              |                              | USA      | 30 | 60  | 19m, 10sm, 3st |     | [23]    |
| <b>Humboldtianinae</b>    |                                                             |                              |          |    |     |                |     |         |
|                           | <b>Humboldtianini</b>                                       |                              |          |    |     |                |     |         |
|                           | <i>Humboldtiana hogeana</i> (E. von Martens, 1892)          |                              | USA      | 30 | 60  | 16m, 11sm, 3st |     | [23]    |
|                           |                                                             |                              |          |    |     |                |     |         |
|                           |                                                             |                              |          |    |     |                |     |         |
|                           |                                                             |                              |          |    |     |                |     |         |
|                           |                                                             |                              |          |    |     |                |     |         |
|                           |                                                             |                              |          |    |     |                |     |         |
|                           |                                                             |                              |          |    |     |                |     |         |
|                           |                                                             |                              |          |    |     |                |     |         |
|                           |                                                             |                              |          |    |     |                |     |         |
| <b>Monadeniinae</b>       |                                                             |                              |          |    |     |                |     |         |
|                           | <i>Monadenia fidelis</i> (J.E. Gray, 1834)                  |                              | USA      | 29 | 58  |                |     | [in 23] |
|                           | <i>Monadenia infumata</i> (Gould, 1855)                     |                              | USA      | 29 | 58  | 16m, 12sm, 1st |     | [23]    |



## References

1. WoRMS Editorial Board. *World Register of Marine Species*. **2021**. <http://www.marinespecies.org> (last accessed June 15, 2021)
2. Molluscabase, **2021**. <http://www.molluscabase.org>. (last accessed June 15, 2021)
3. Patterson, C.M. Chromosomes of molluscs. Proceedings of the 2nd Symposium of Mollusca, Ernakulam, Cochin, India. Marine Biological Association of India. Mandapam Camp. **1969**. Symposium series 3, part 2, 635-686.
4. Thiriot-Quiévreux, C. Advances in chromosomal studies of gastropod molluscs. *J. Molluscan Stud.* **2003**, 69, 187-201. DOI:10.1093/mollus/69.3.187.
5. Babrakzai, N.; Samsam, S.; Miller, W.B. Cytological Relationships of Helminthoglyptidae and Bradybaenidae (Mollusca, Pulmonata). *Proceedings of the Twenty-Fourth Annual Meeting of the Arizona-Nevada Academy of Science and The Fifty-Sixth Annual Meeting Southwestern and Rocky Mountain Division American Association for the Advancement of Science April 9 To April 12, 1980 MGM Hotel, Las Vegas, Nevada*, pp 31.
6. Park, G.M. Karyological analysis of Korean endemic land snail, *Koreanohadra kurodana* (Gastropoda: Bradybaenidae). *Caryologia* **2016**, 69, 339-342. <https://doi.org/10.1080/00087114.2016.1224403>
7. Tatewaki, R.; Kitada, J. Karyological studies of five species of land snails (Helicoidea, Mollusca). *Genetica* **1987**, 74, 73-80. <https://doi.org/10.1007/BF00055097>
8. Laws, H.M. The Chromosomes of Some Australian Camaenid Land Snails. *Cytologia* **1973**, 38, 229-235. doi: 10.1508/cytologia.38.229.
9. Aparicio, M.T. Cytotaxonomic studies of the family Helicidae (Gastropoda, Eupulmonata). *Genét. Ibér.* **1981**, 33, 211-224.
10. Vitturi, R.; Rasotto, M.B.; Farinella-Ferruzza, N. The chromosomes of 16 molluscan species. *Boll. Zool.* **1982**, 49, 61-71. <https://doi.org/10.1080/11250008209439373>.
11. Ramos, M.A.; Aparicio, M.T. Cytotaxonomic Study of Some Spanish and Portuguese Helicidae (Pulmonata: Geophila). *Malacological Review* **1985**, 18, 73 -82.
12. Chakvetadze, N.; Bakhtadze N.; Mumladze, L.; Tskhadaia, E. Chromosome numbers of terrestrial mollusks (Mollusca: Gastropoda) of Georgia. 1st Meeting of the Mollusc Research Society Austria (MoFA) in Salzburg. *Arianta* **2019**, 7, 10.
13. Bantock, C.R. Localisation of chiasmata in *Cepaea nemoralis* L. *Heredity* **1972**, 29, 213-221. <https://doi.org/10.1038/hdy.1972.85>.
14. Page, C. The Karyotype of the Land Snail *Cepaea Nemoralis* (L.). *Heredity* **1978**, 41, 321-325. <https://doi.org/10.1038/hdy.1978.102>.
15. Bakhtadze, N.G.; Chakvetadze, N.L.; Mumladze, L.J.; Bakhtadze, G.I.; Tskhadaia, E.A. Karyological data of terrestrial mollusks (Mollusca: Gastropoda: Pulmonata) of Georgia. *Proc. Inst. Zool.* **2014**, 25, 23-27. DOI:10.13140/2.1.4677.1525
16. Petraccioli, A.; Crovato, P.; De Vico, G.; Odierna, G.; Picariello, O.L.A.; Tardy, E.; Viglietti, S.; Guarino, F.M.; Maio, N. *Helix straminea* Briganti, 1825 in Italy (Gastropoda, Pulmonata), taxonomic history, morphology, biology, distribution and phylogeny. *Eur. Zool. J.* **2021**, 88, 390–416, doi:10.1080/24750263.2021.1892217.

17. Vitturi, R.; Libertini, A.; Sineo, L.; Sparacio, I.; Lannino, A.; Gregorini, A.; Colomba, M.  
Cytogenetics of the land snails *Cantareus aspersus* and *C. mazzullii* (Mollusca, Gastropoda, Pulmonata). *Micron* **2005**, 36, 351-357. DOI: 10.1016/j.micron.2004.12.010
18. Aparicio, M.T. The chromosomes of eight species of the subfamily Helicinae (Gastropoda, Pulmonata, Helicidae) from Spain. *Malacological Review* **1983**, 16, 71-78.
19. Hrabakova, M.; Juricková, L.; Petrusek, A. Taxonomy of the genus *Trochulus* (Gastropoda: Hygromiidae) in the Czech Republic. *Abstracts of Molluscan Forum November 2nd 2006 held in the Palaeontology Demonstration Room of the Natural History Museum, London. The Malacologist* **2006**.
- 20 Stern, E.M.; Metcalf, A.L. Chromosome Numbers in *Ashmunella* (Gastropoda Eupulmonata Polygyridae). *Veliger* **1974**, 17, 19- 22.
21. Husted, L.; Burch, P.R. The Chromosomes of Polygyrid Snails. *Am. Nat.* **1946**, 80, 410-429.
22. Diopotex-Chong, M.E.; Babrakzai, N. Preliminary cytological studies in *Triodopsis fosteri* (Baker, 1920) Mollusca-Eupulmonata Polygyridae. *An. Inst. Cienc. del Mar y Limnol.* **1993**, 19, 13-18.
23. Babrakzai, N. Chromosomes of Helminthoglyptidae (Pulmonata: Gastropoda). PhD dissertation **1975**, Department of Biological Sciences, University of Arizona.

**Table S2.** Relative length (RL) and Centromeric Index (CI) of the studied taxa. Mo. Sp. = *Monacha* sp.; Tr.e. = *Trochoidea elegans*; Tr.p. = *Trochoidea pyramidata*; Tr.t. = *Trochoidea trochoides*; Ce.v. = *Cernuella virgata*; Co.a. = *Cochlicella acuta*; Eo.v. = *Eobania vermiculata*; Ot.l. = *Otala lactea*; Co.ap. = *Cornu apertus*; Er.m. = *Ercella mazzullii*; He.g. = *Helix gussoneana*; He.l. = *Helix lucorum*; Th.p. A = *Theba pisana* (Fusaro, Naples); Th.p. B = *Theba pisana* (Messina); Ca.p. = *Campylaea planospira*; Ma.. = *Marmorana platychela*.

| Chr. | Mo. sp. |      | Tr.e. |      | Tr.p. |      | Tr.t. |      | Ce.v. |      | Co.a. |      | Eo.v. |      | Ot.l |      | Co.ap. |      | Er.m. |      | He.g. |      | He.l. |      | Th.p. A |      | Th. p. B |      | Ca.p. |      | Ma.p. |      |
|------|---------|------|-------|------|-------|------|-------|------|-------|------|-------|------|-------|------|------|------|--------|------|-------|------|-------|------|-------|------|---------|------|----------|------|-------|------|-------|------|
|      | RL      | CI   | RL    | CI   | RL    | CI   | RL    | CI   | RL    | CI   | RL    | CI   | RL    | CI   | RL   | CI   | RL     | CI   | RL    | CI   | RL    | CI   | RL    | CI   | RL      | CI   | RL       | CI   | RL    | CI   | RL    | CI   |
| 1    | 9.3     | 42.7 | 7.5   | 37.1 | 8.3   | 30.5 | 7.9   | 35.4 | 9.5   | 45.2 | 10.9  | 48.8 | 12.3  | 44.4 | 11.7 | 47.9 | 7.5    | 47.8 | 7.2   | 44.6 | 9.5   | 47.5 | 7.9   | 38.4 | 7.2     | 46.4 | 7.0      | 44.5 | 6.2   | 46.5 | 5.9   | 46.7 |
| 2    | 8.0     | 34.9 | 6.9   | 47.2 | 8.0   | 45.1 | 7.4   | 42.8 | 6.1   | 39.8 | 9.9   | 43.5 | 6.9   | 41.0 | 6.6  | 47.5 | 5.2    | 41.8 | 5.0   | 41.6 | 7.4   | 40.1 | 6.5   | 31.3 | 5.2     | 39.6 | 5.0      | 41.8 | 5.1   | 47.4 | 5.6   | 48.1 |
| 3    | 6.9     | 44.4 | 6.7   | 39.8 | 7.3   | 40.2 | 7.0   | 36.5 | 4.7   | 41.9 | 6.1   | 48.1 | 6.3   | 40.9 | 6.3  | 45.2 | 5.0    | 44.4 | 4.9   | 42.7 | 5.8   | 43.2 | 6.5   | 10.9 | 4.5     | 48.0 | 4.6      | 45.8 | 4.6   | 41.9 | 5.2   | 45.5 |
| 4    | 5.7     | 40.1 | 4.5   | 39.7 | 5.2   | 43.1 | 5.1   | 31.7 | 4.5   | 44.0 | 5.5   | 46.1 | 5.1   | 41.1 | 4.9  | 43.5 | 4.7    | 41.7 | 4.8   | 42.8 | 5.2   | 48.2 | 5.2   | 47.8 | 4.4     | 46.1 | 4.5      | 43.5 | 4.4   | 44.3 | 5.1   | 45.9 |
| 5    | 4.8     | 40.6 | 4.5   | 39.6 | 5.0   | 34.7 | 5.1   | 47.3 | 4.1   | 40.6 | 5.0   | 39.4 | 4.7   | 43.5 | 4.6  | 45.3 | 4.6    | 24.7 | 4.5   | 45.9 | 4.8   | 42.9 | 5.1   | 0.0  | 4.4     | 43.8 | 4.3      | 41.1 | 4.2   | 43.6 | 4.7   | 47.4 |
| 6    | 4.8     | 39.5 | 4.4   | 44.9 | 4.5   | 36.6 | 4.6   | 34.1 | 4.1   | 41.9 | 4.9   | 44.7 | 4.7   | 46.1 | 4.3  | 49.0 | 4.4    | 43.6 | 4.3   | 43.8 | 4.3   | 42.1 | 5.1   | 10.0 | 4.1     | 43.1 | 4.0      | 42.5 | 4.0   | 48.6 | 4.2   | 38.8 |
| 7    | 4.4     | 41.8 | 4.1   | 43.4 | 4.4   | 47.8 | 4.6   | 47.0 | 4.0   | 41.9 | 3.9   | 35.8 | 4.4   | 42.3 | 3.8  | 43.7 | 4.4    | 44.8 | 4.2   | 39.2 | 4.3   | 29.1 | 5.0   | 0.0  | 3.9     | 45.6 | 3.9      | 46.9 | 4.0   | 44.9 | 4.1   | 40.8 |
| 8    | 4.4     | 42.2 | 4.1   | 34.7 | 4.3   | 41.2 | 4.1   | 29.5 | 4.0   | 45.6 | 3.9   | 35.6 | 4.0   | 41.8 | 3.8  | 31.3 | 4.1    | 41.8 | 4.0   | 40.3 | 4.2   | 48.3 | 4.4   | 8.8  | 3.6     | 44.0 | 3.7      | 43.0 | 4.0   | 38.9 | 4.0   | 40.6 |
| 9    | 4.4     | 40.3 | 4.1   | 31.9 | 4.3   | 39.4 | 4.0   | 43.8 | 3.9   | 45.1 | 3.9   | 41.5 | 3.9   | 45.5 | 3.8  | 37.1 | 4.0    | 36.2 | 3.9   | 44.2 | 4.1   | 42.1 | 4.1   | 9.9  | 3.4     | 39.7 | 3.6      | 40.6 | 4.0   | 43.5 | 3.9   | 46.2 |
| 10   | 4.2     | 44.8 | 4.0   | 45.4 | 3.9   | 40.6 | 3.9   | 40.3 | 3.9   | 43.2 | 3.7   | 8.8  | 3.8   | 46.3 | 3.8  | 40.0 | 4.0    | 48.3 | 3.9   | 44.4 | 4.4   | 47.2 | 4.0   | 41.2 | 3.4     | 40.8 | 3.5      | 44.2 | 3.9   | 44.7 | 3.9   | 38.2 |
| 11   | 4.1     | 48.4 | 4.0   | 7.8  | 3.8   | 32.5 | 3.8   | 31.5 | 3.9   | 40.4 | 3.6   | 47.5 | 3.6   | 40.7 | 3.7  | 42.9 | 4.0    | 47.2 | 3.9   | 42.9 | 4.0   | 46.6 | 3.8   | 47.0 | 3.3     | 47.8 | 3.5      | 46.1 | 3.6   | 48.6 | 3.6   | 39.9 |
| 12   | 4.0     | 45.9 | 4.0   | 36.9 | 3.7   | 38.5 | 3.8   | 39.7 | 3.9   | 41.3 | 3.5   | 33.2 | 3.4   | 34.2 | 3.4  | 34.8 | 3.9    | 41.3 | 3.8   | 43.0 | 3.3   | 33.7 | 3.6   | 0.0  | 3.3     | 46.8 | 3.4      | 44.4 | 3.4   | 44.2 | 3.5   | 46.5 |
| 13   | 4.2     | 34.0 | 4.0   | 41.0 | 3.7   | 40.2 | 3.8   | 40.4 | 3.6   | 32.3 | 3.4   | 41.1 | 3.3   | 38.4 | 3.4  | 44.3 | 3.6    | 43.4 | 3.8   | 42.2 | 3.2   | 24.3 | 3.3   | 0.0  | 3.3     | 38.6 | 3.2      | 40.6 | 3.4   | 46.8 | 3.4   | 43.1 |
| 14   | 4.0     | 43.2 | 4.0   | 42.6 | 3.4   | 47.6 | 3.7   | 44.9 | 3.6   | 42.3 | 3.3   | 39.1 | 3.3   | 47.4 | 3.3  | 40.6 | 3.4    | 42.3 | 3.7   | 39.5 | 3.1   | 34.3 | 3.2   | 38.6 | 3.2     | 43.2 | 3.2      | 40.3 | 3.3   | 47.6 | 3.2   | 48.8 |
| 15   | 3.9     | 43.1 | 3.8   | 40.8 | 3.3   | 42.4 | 3.7   | 38.6 | 3.6   | 32.9 | 3.2   | 39.5 | 2.9   | 45.5 | 3.3  | 38.1 | 3.4    | 46.0 | 3.4   | 44.1 | 3.1   | 39.9 | 3.0   | 0.0  | 3.2     | 44.5 | 3.2      | 43.2 | 3.3   | 44.6 | 3.1   | 39.8 |
| 16   | 3.7     | 41.6 | 3.7   | 27.2 | 3.3   | 46.0 | 3.7   | 43.8 | 3.3   | 40.0 | 3.2   | 27.9 | 2.9   | 43.6 | 3.2  | 44.1 | 3.3    | 46.5 | 3.4   | 31.0 | 2.9   | 47.1 | 2.7   | 40.9 | 3.1     | 44.2 | 3.1      | 44.9 | 3.2   | 39.5 | 2.9   | 42.8 |
| 17   | 3.3     | 40.8 | 3.6   | 36.4 | 3.3   | 44.8 | 3.5   | 40.0 | 3.2   | 38.6 | 2.9   | 23.6 | 2.9   | 40.4 | 3.2  | 30.1 | 3.2    | 40.5 | 3.3   | 48.4 | 2.9   | 26.8 | 2.7   | 7.9  | 3.1     | 41.1 | 3.1      | 39.1 | 3.2   | 43.5 | 2.9   | 39.5 |
| 18   | 3.0     | 41.9 | 3.6   | 42.3 | 3.3   | 44.8 | 3.3   | 29.1 | 3.2   | 39.0 | 2.6   | 37.6 | 2.7   | 43.9 | 3.1  | 45.5 | 3.2    | 29.8 | 3.1   | 45.4 | 2.9   | 46.9 | 2.7   | 0.0  | 3.0     | 47.2 | 3.0      | 48.0 | 2.8   | 41.9 | 2.8   | 43.8 |
| 19   | 2.6     | 43.8 | 3.5   | 44.7 | 3.1   | 45.4 | 3.3   | 40.2 | 3.1   | 39.1 | 2.6   | 43.2 | 2.6   | 42.9 | 3.0  | 44.3 | 3.1    | 40.7 | 3.0   | 39.8 | 2.8   | 42.2 | 2.6   | 0.0  | 2.9     | 45.6 | 2.9      | 46.1 | 2.8   | 44.9 | 2.8   | 44.2 |
| 20   | 3.7     | 39.9 | 3.4   | 41.9 | 2.9   | 40.0 | 3.2   | 42.9 | 3.1   | 40.1 | 2.3   | 47.3 | 2.6   | 41.1 | 2.9  | 35.8 | 3.1    | 42.3 | 3.0   | 32.8 | 2.7   | 48.8 | 2.6   | 0.0  | 2.8     | 41.8 | 2.9      | 40.0 | 2.7   | 44.1 | 2.7   | 40.2 |
| 21   | 2.6     | 40.9 | 3.2   | 29.7 | 2.9   | 47.9 | 3.1   | 39.4 | 3.0   | 39.3 | 2.1   | 44.6 | 2.6   | 45.7 | 2.9  | 48.7 | 2.9    | 39.6 | 3.0   | 47.8 | 2.5   | 45.9 | 2.5   | 45.8 | 2.8     | 42.4 | 2.8      | 40.4 | 2.7   | 43.5 | 2.7   | 42.5 |
| 22   | 2.3     | 32.2 | 3.2   | 46.6 | 2.9   | 43.9 | 2.6   | 40.3 | 2.8   | 45.5 | 2.1   | 18.1 | 2.6   | 29.8 | 2.8  | 39.5 | 2.6    | 41.9 | 3.0   | 41.6 | 2.4   | 41.2 | 2.5   | 45.8 | 2.7     | 39.8 | 2.7      | 41.9 | 2.7   | 40.4 | 2.6   | 29.4 |
| 23   | 1.7     | 42.2 | 2.8   | 0.0  | 2.8   | 43.8 | 2.5   | 38.1 | 2.8   | 38.2 | 2.0   | 32.7 | 2.5   | 45.5 | 2.8  | 38.9 | 2.6    | 36.0 | 2.9   | 42.3 | 2.3   | 48.8 | 2.5   | 0.0  | 2.6     | 46.7 | 2.6      | 45.8 | 2.7   | 42.8 | 2.5   | 42.0 |
| 24   |         |      | 2.6   | 38.6 | 2.3   | 46.3 | 2.2   | 0.0  | 2.8   | 43.7 | 1.9   | 42.2 | 2.3   | 44.3 | 2.4  | 40.8 | 2.5    | 40.6 | 2.6   | 45.0 | 2.1   | 40.1 | 2.4   | 0.0  | 2.5     | 44.6 | 2.5      | 46.0 | 2.7   | 45.6 | 2.4   | 46.2 |
| 25   |         |      |       |      |       |      |       |      | 2.6   | 46.1 | 1.9   | 40.5 | 2.0   | 45.9 | 2.0  | 42.3 | 2.5    | 31.7 | 2.6   | 42.7 | 2.1   | 43.4 | 2.2   | 0.0  | 2.5     | 40.1 | 2.5      | 42.6 | 2.6   | 46.0 | 2.3   | 42.8 |
| 26   |         |      |       |      |       |      |       |      | 2.6   | 46.4 | 1.8   | 41.3 | 2.0   | 46.8 | 1.1  | 0.0  | 2.4    | 43.0 | 2.6   | 40.4 | 2.1   | 41.8 | 2.2   | 46.5 | 2.3     | 40.0 | 2.4      | 39.9 | 2.4   | 41.4 | 2.2   | 40.5 |
| 27   |         |      |       |      |       |      |       |      |       |      |       |      |       |      |      |      | 2.3    | 42.6 | 2.4   | 45.8 | 1.9   | 20.0 | 1.6   | 48.3 | 2.3     | 45.1 | 2.3      | 430  | 2.3   | 46.2 | 2.2   | 41.0 |
| 28   |         |      |       |      |       |      |       |      |       |      |       |      |       |      |      |      |        |      |       |      |       |      |       |      | 2.3     | 42.2 | 2.3      | 41.0 | 2.3   | 31.9 | 2.1   | 38.1 |
| 29   |         |      |       |      |       |      |       |      |       |      |       |      |       |      |      |      |        |      |       |      |       |      |       |      | 2.3     | 48.6 | 2.2      | 44.2 | 1.8   | 45.4 | 1.8   | 29.8 |
| 30   |         |      |       |      |       |      |       |      |       |      |       |      |       |      |      |      |        |      |       |      |       |      |       |      | 2.3     | 48.5 | 2.2      | 45.9 | 1.7   | 43.7 | 1.6   | 49.0 |

**Table S3.** Distance matrix of the homologous traits of 16S rDNA of the *Monacha* species considered in the paper. M. cart = *Monacha cartusiana*; M. cisc = *Monacha ciscaucasica*; IT = Italy; Bosn Herz = Bosnia Herzegovina.

|                                 |        |        |        |        |        |        |        |        |        |        |        |
|---------------------------------|--------|--------|--------|--------|--------|--------|--------|--------|--------|--------|--------|
| GAST 32 Portici (IT)            | 0.0000 | 0.1737 | 0.1737 | 0.1737 | 0.1689 | 0.1737 | 0.1689 | 0.1580 | 0.1624 | 0.1691 | 0.1898 |
| M. cart KM247397 Brescia (IT)   | 0.1737 | 0.0000 | 0.0000 | 0.0000 | 0.0037 | 0.0000 | 0.0075 | 0.1894 | 0.1940 | 0.1413 | 0.1704 |
| M. cart KX495378 Lombardia (IT) | 0.1737 | 0.0000 | 0.0000 | 0.0000 | 0.0037 | 0.0000 | 0.0075 | 0.1894 | 0.1940 | 0.1413 | 0.1704 |
| M. cart AY741416 Siena (IT)     | 0.1737 | 0.0000 | 0.0000 | 0.0000 | 0.0037 | 0.0000 | 0.0075 | 0.1894 | 0.1940 | 0.1413 | 0.1704 |
| M. cart M247391 Hungary         | 0.1689 | 0.0037 | 0.0037 | 0.0037 | 0.0000 | 0.0037 | 0.0037 | 0.1847 | 0.1893 | 0.1368 | 0.1657 |
| M. cart MG585433 Spain          | 0.1737 | 0.0000 | 0.0000 | 0.0000 | 0.0037 | 0.0000 | 0.0075 | 0.1894 | 0.1940 | 0.1413 | 0.1704 |
| M. cart MH204083 Bosn. Herz.    | 0.1689 | 0.0075 | 0.0075 | 0.0075 | 0.0037 | 0.0075 | 0.0000 | 0.1847 | 0.1893 | 0.1368 | 0.1704 |
| M. cisc KX495397 Russia         | 0.1580 | 0.1894 | 0.1894 | 0.1894 | 0.1847 | 0.1894 | 0.1847 | 0.0000 | 0.0181 | 0.1608 | 0.2030 |
| M. roseni KX495386 Russia       | 0.1624 | 0.1940 | 0.1940 | 0.1940 | 0.1893 | 0.1940 | 0.1893 | 0.0181 | 0.0000 | 0.1608 | 0.2076 |
| M. nummus KX495427 Lebanon      | 0.1691 | 0.1413 | 0.1413 | 0.1413 | 0.1368 | 0.1413 | 0.1368 | 0.1608 | 0.1608 | 0.0000 | 0.1864 |
| M. sp1 KX495425 Sicily (IT)     | 0.1898 | 0.1704 | 0.1704 | 0.1704 | 0.1657 | 0.1704 | 0.1704 | 0.2030 | 0.2076 | 0.1864 | 0.0000 |
